# Supplementary material for: Beneficial Effect of Bidens pilosa on Body Weight Gain, Food Conversion Ratio, Gut Bacteria and Coccidiosis in Chickens
Source: PubMed Central journal article supplement (PMC4713076; doi:10.1371/journal.pone.0146141), 2016-01-14
Supplement: pone.0146141.s001.pdf [file pone.0146141.s001.pdf]

A

# CTR\_4D

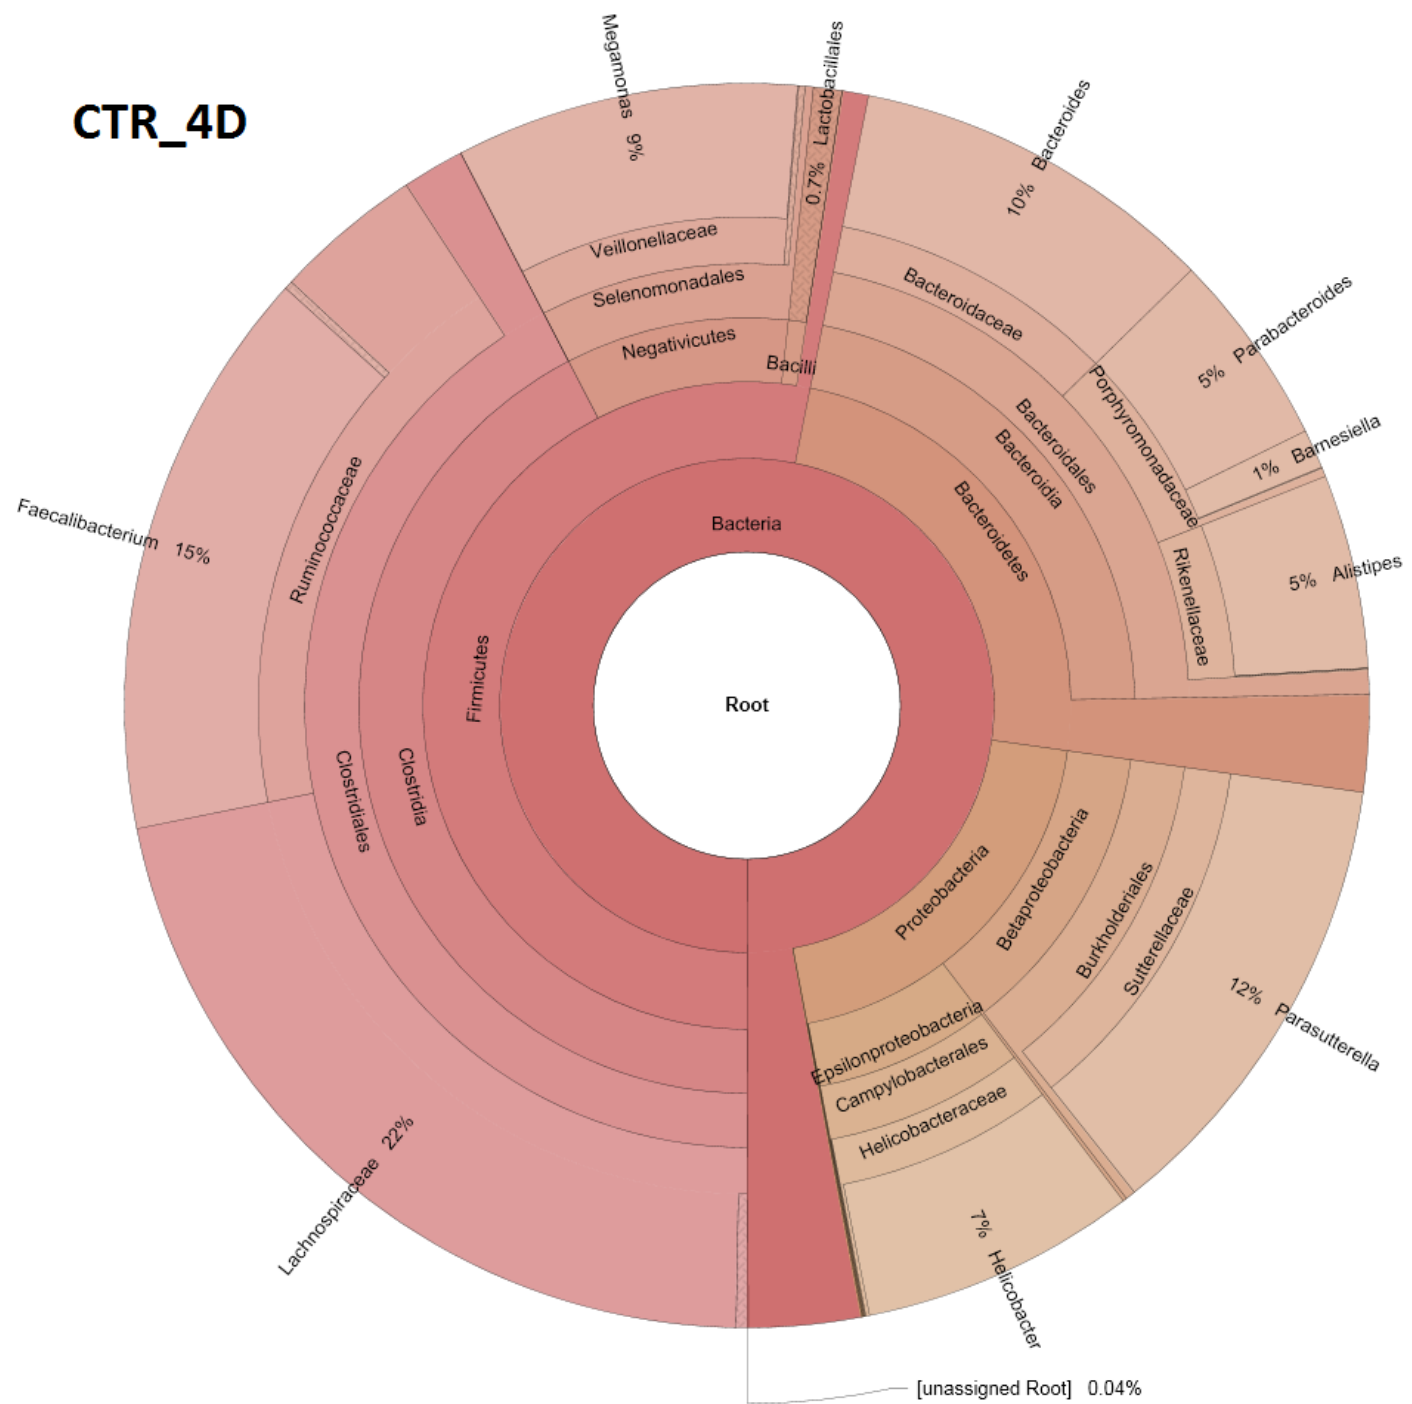

B

# BPP\_4D

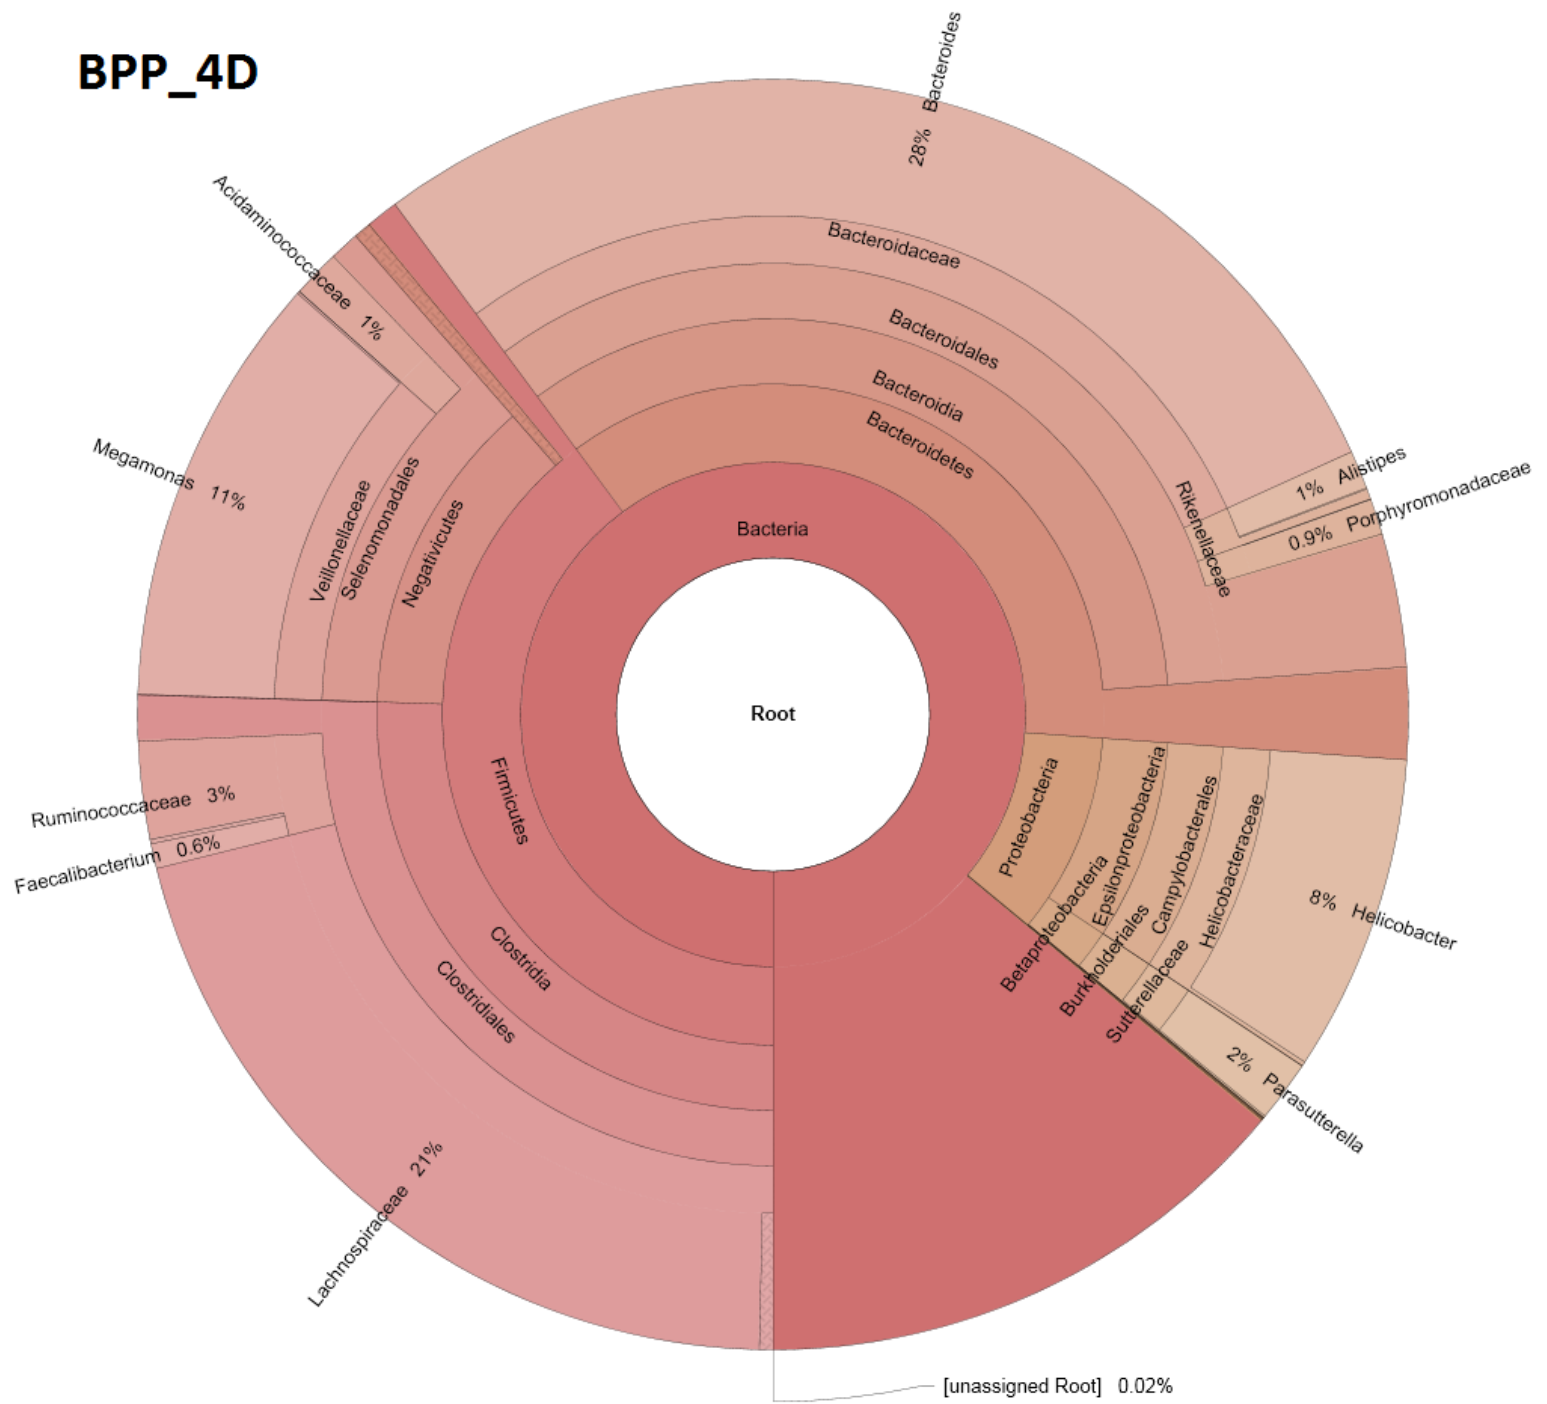

C

Et\_4D

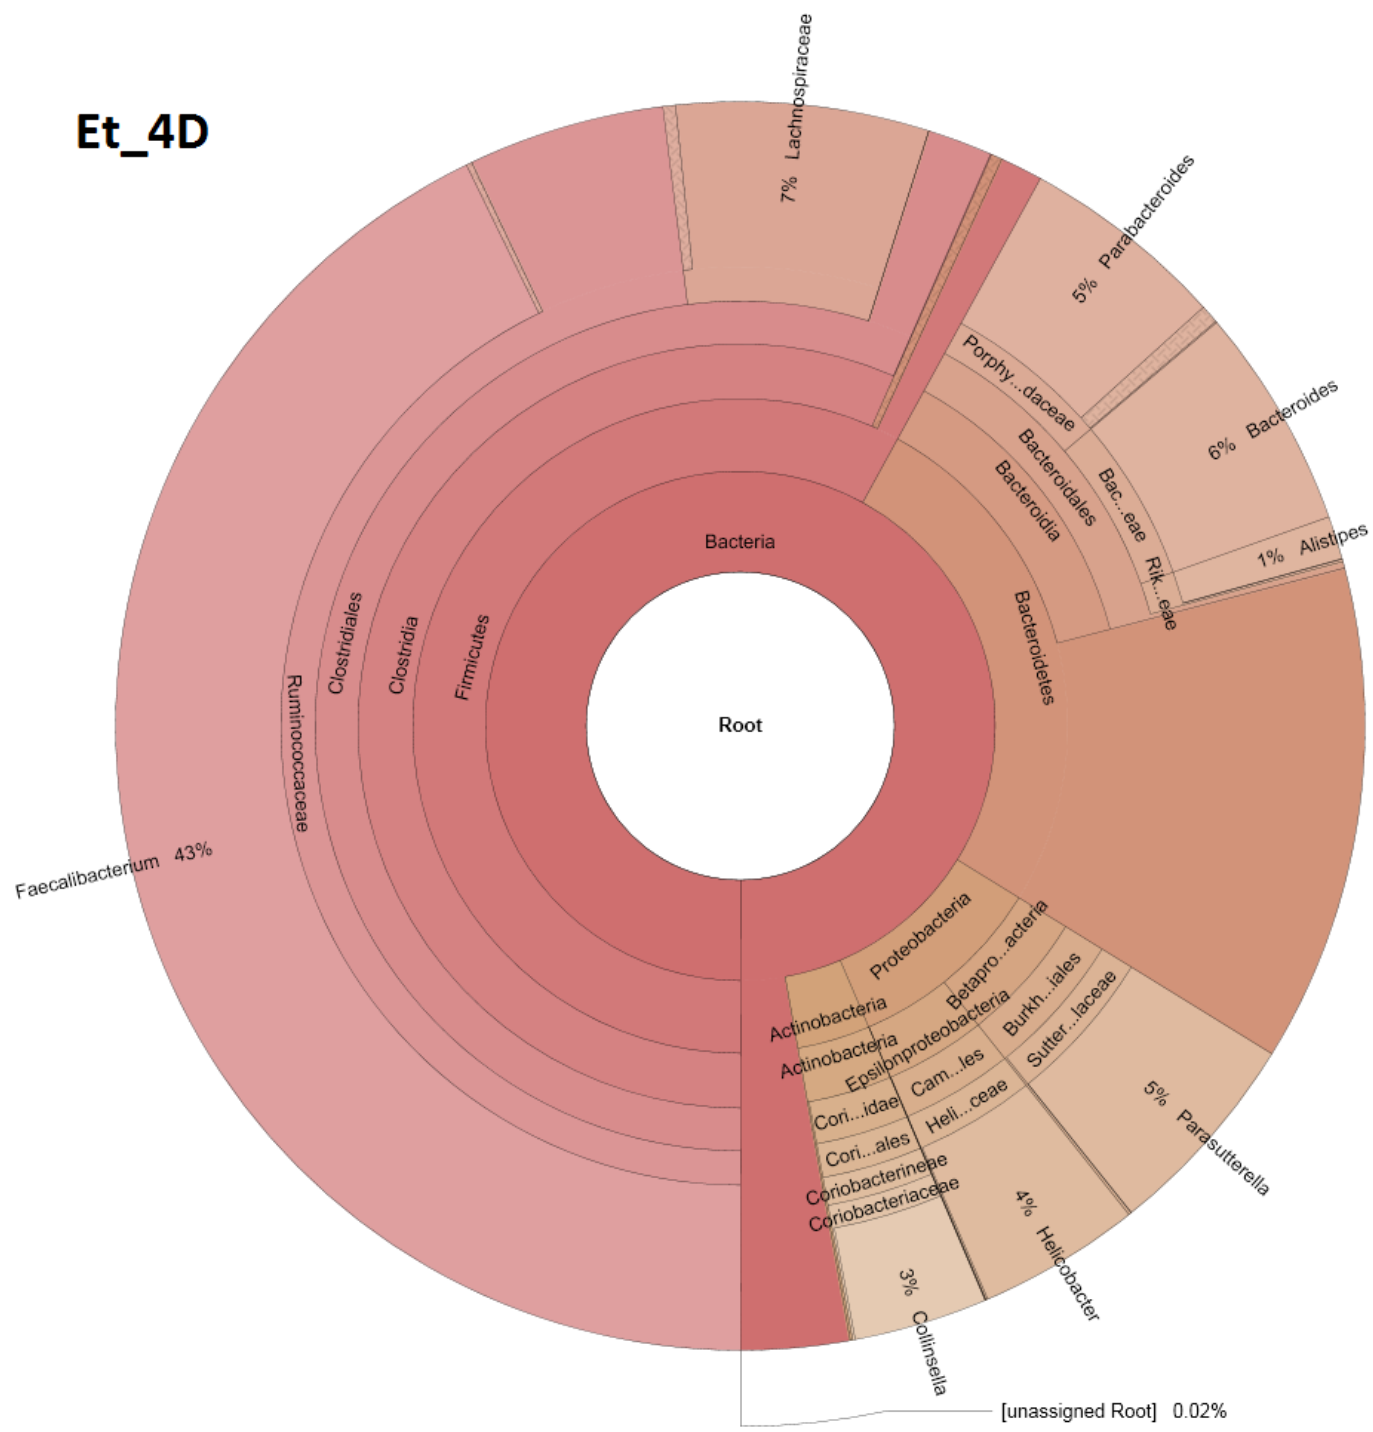

D

# BPP + Et\_4D

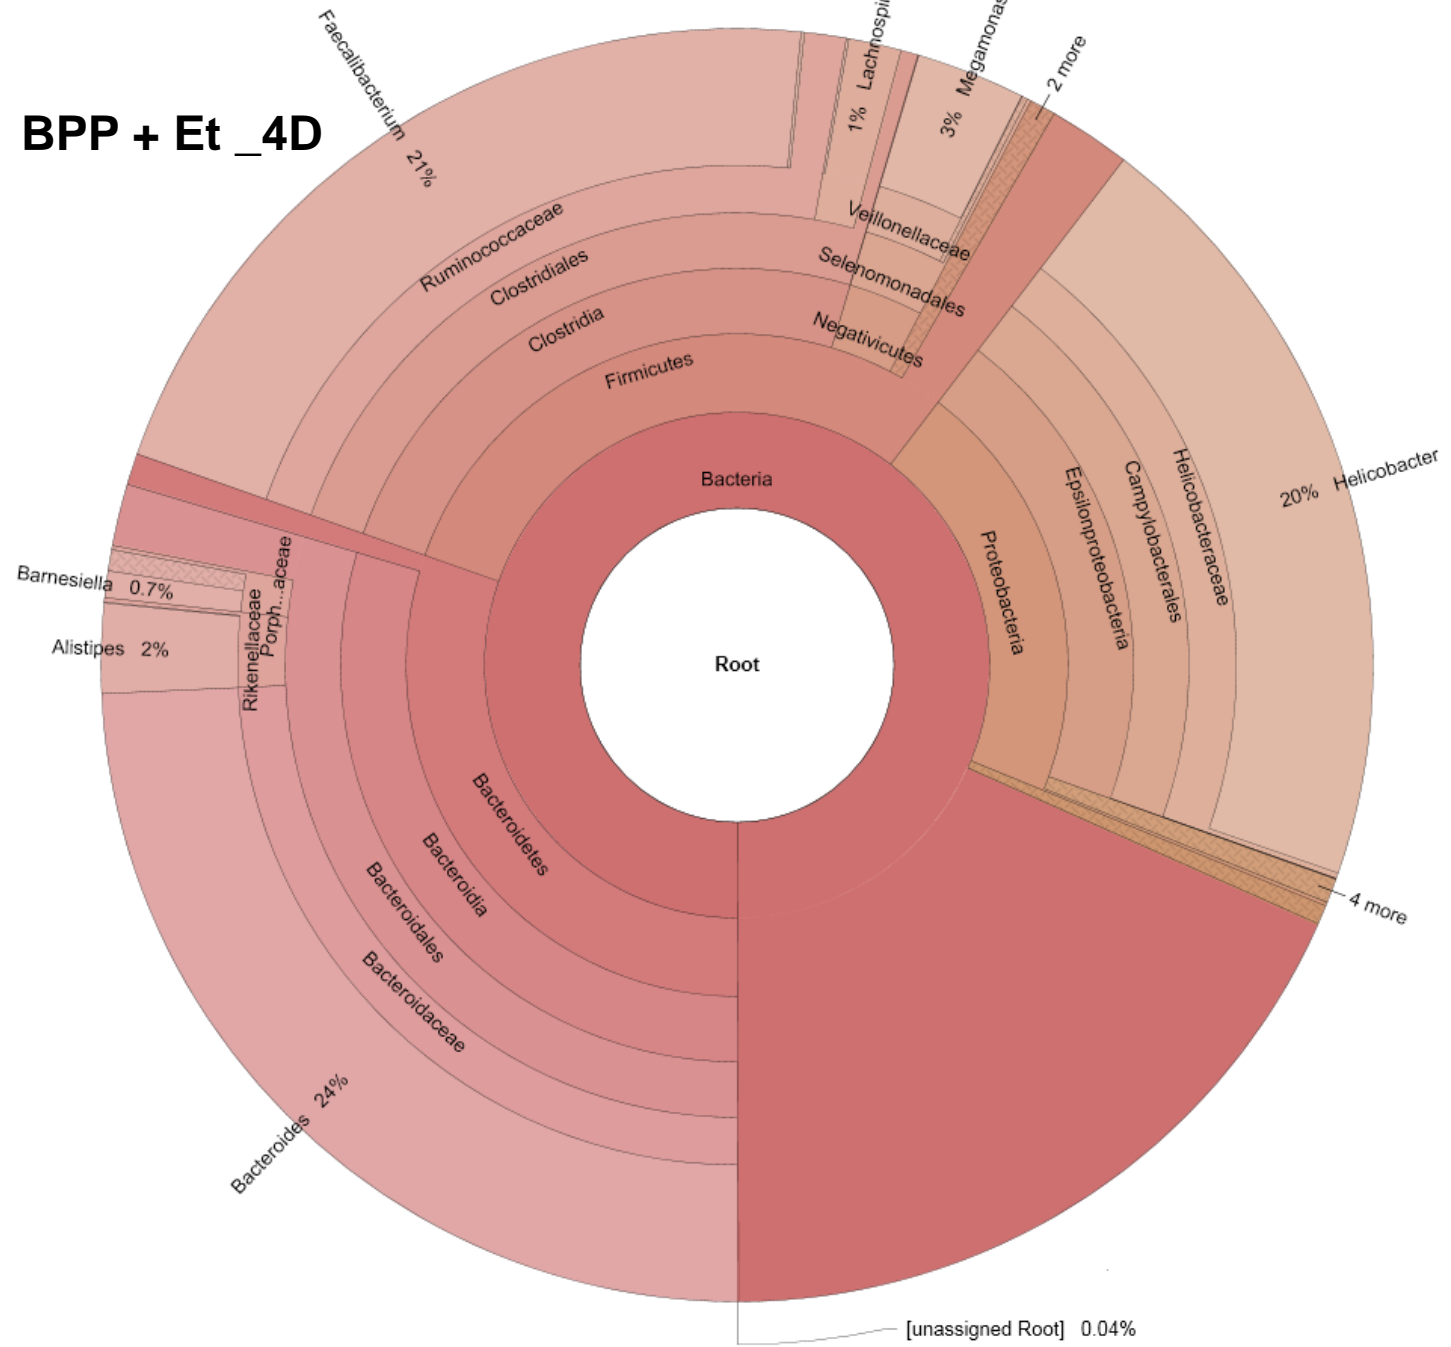

E

# CTR\_7D

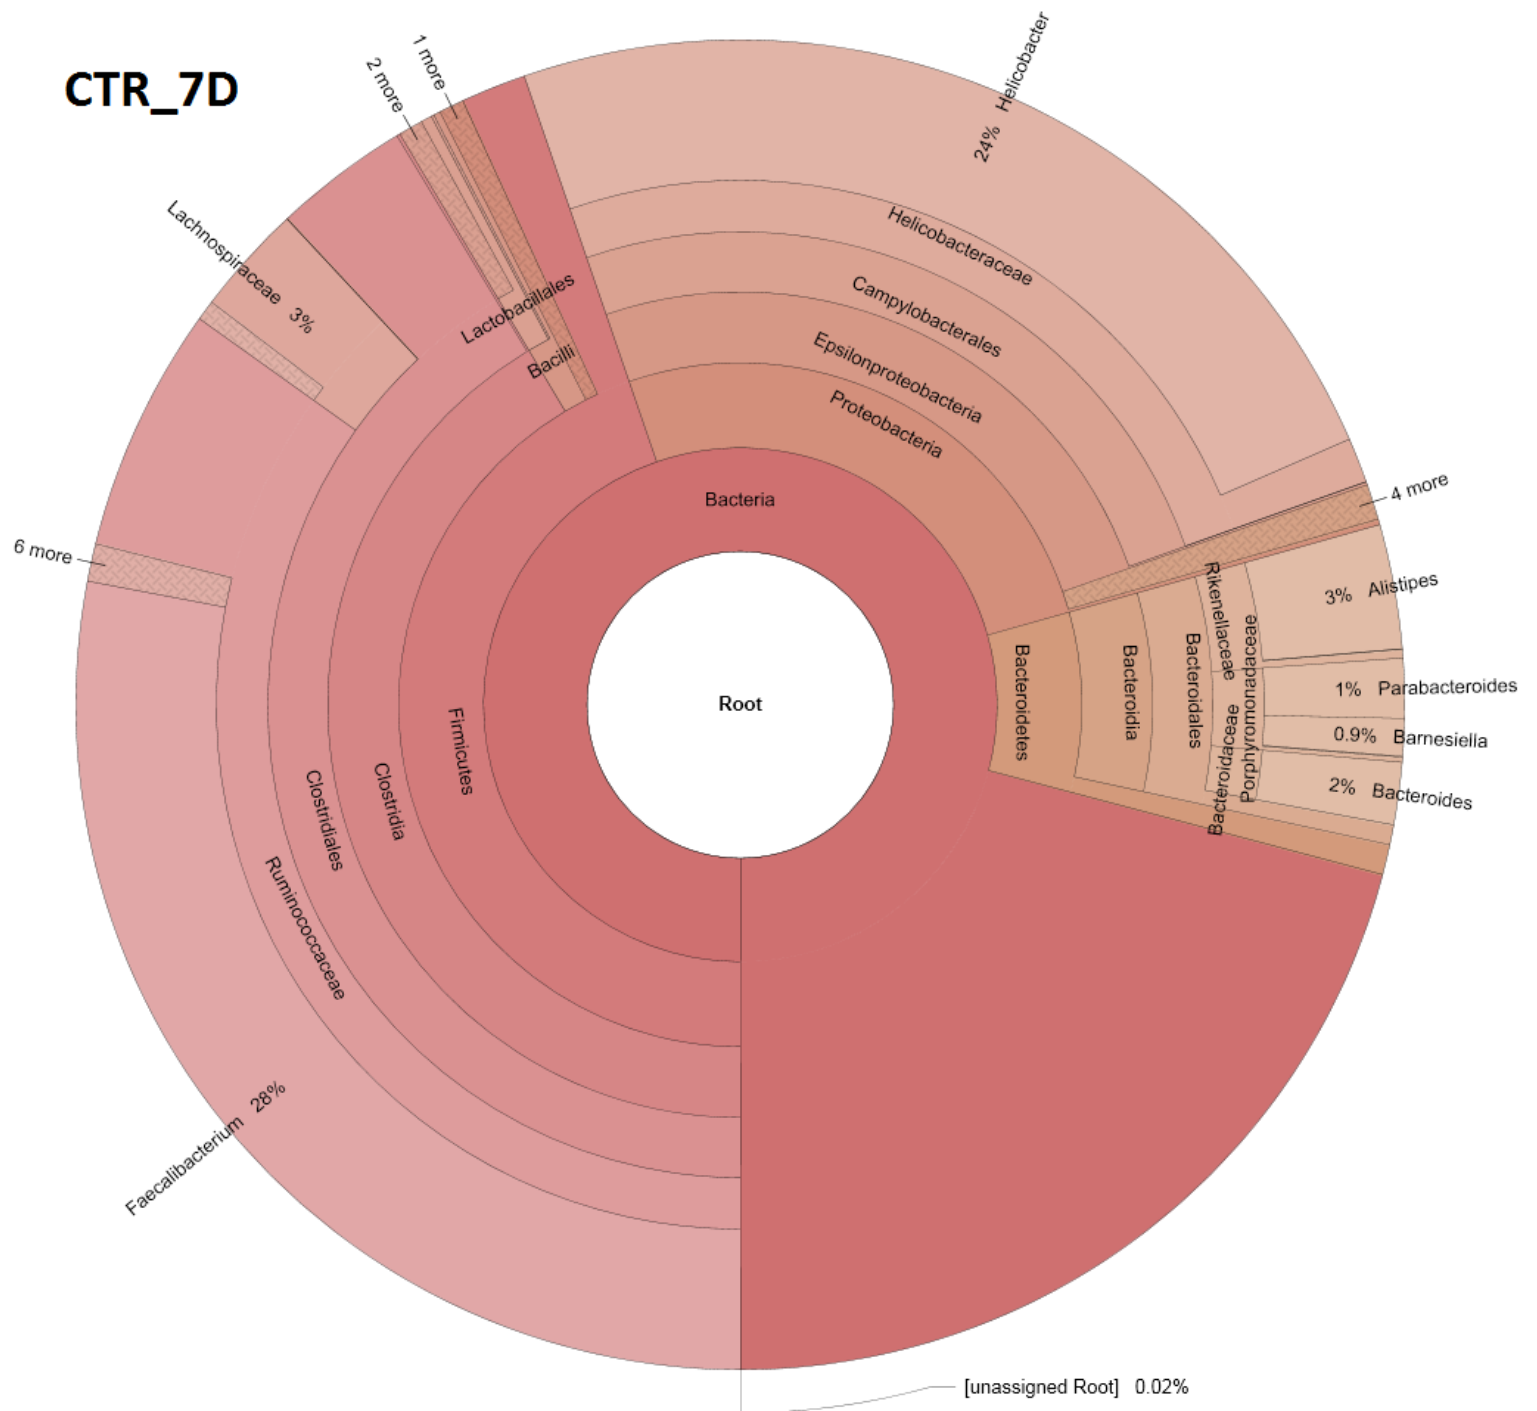

F

# BPP\_7D

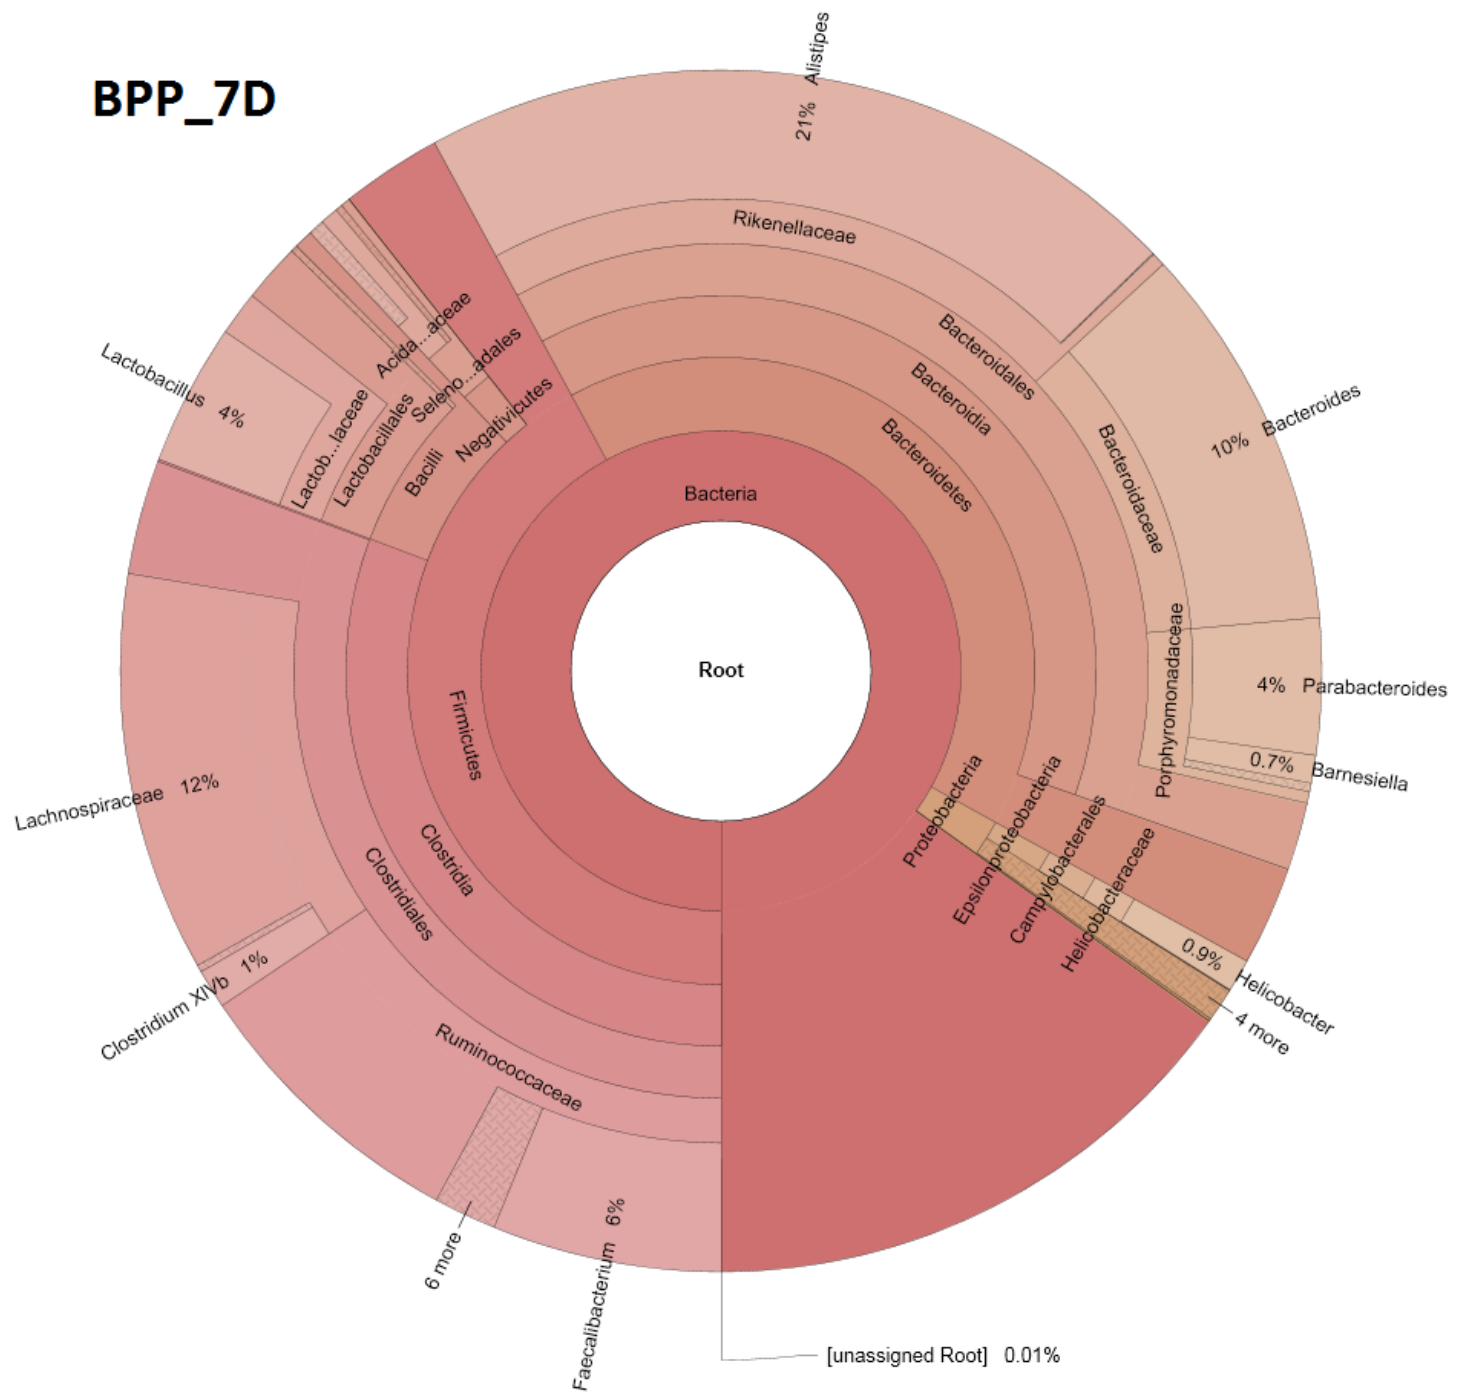

G

# Et\_7D

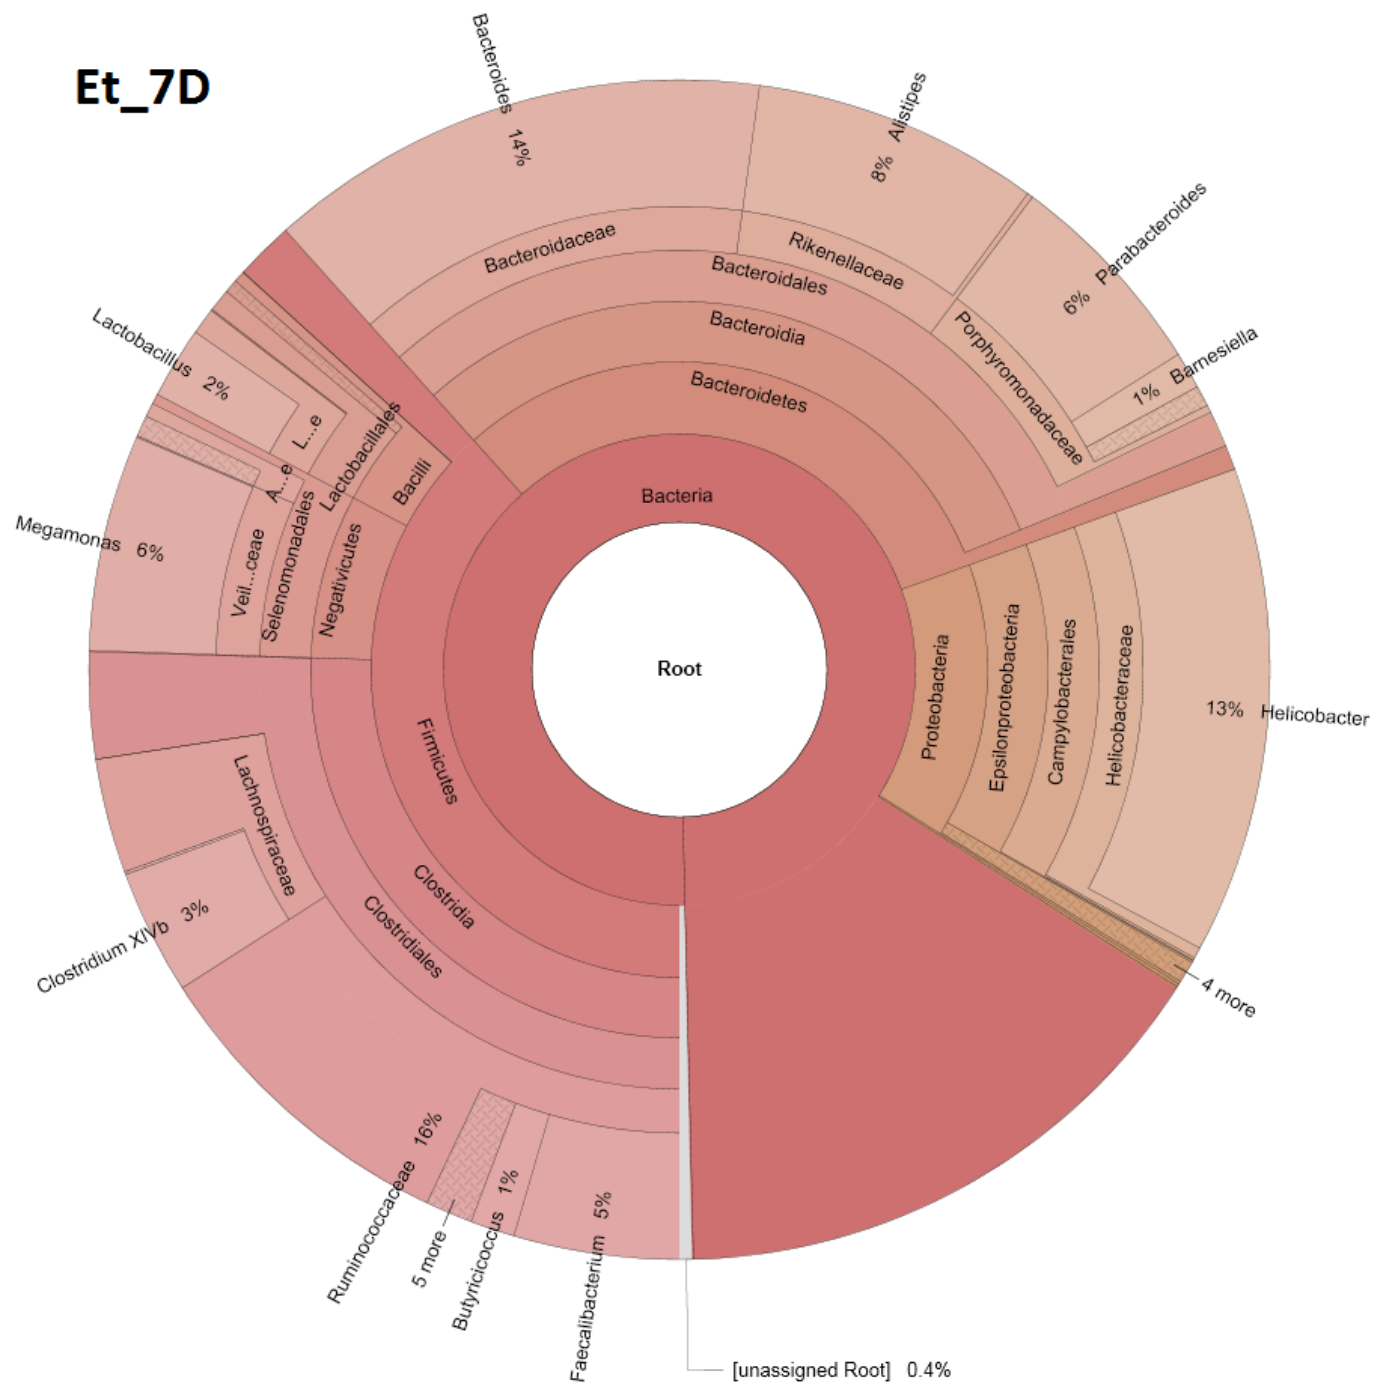

# BPP + Et\_7D

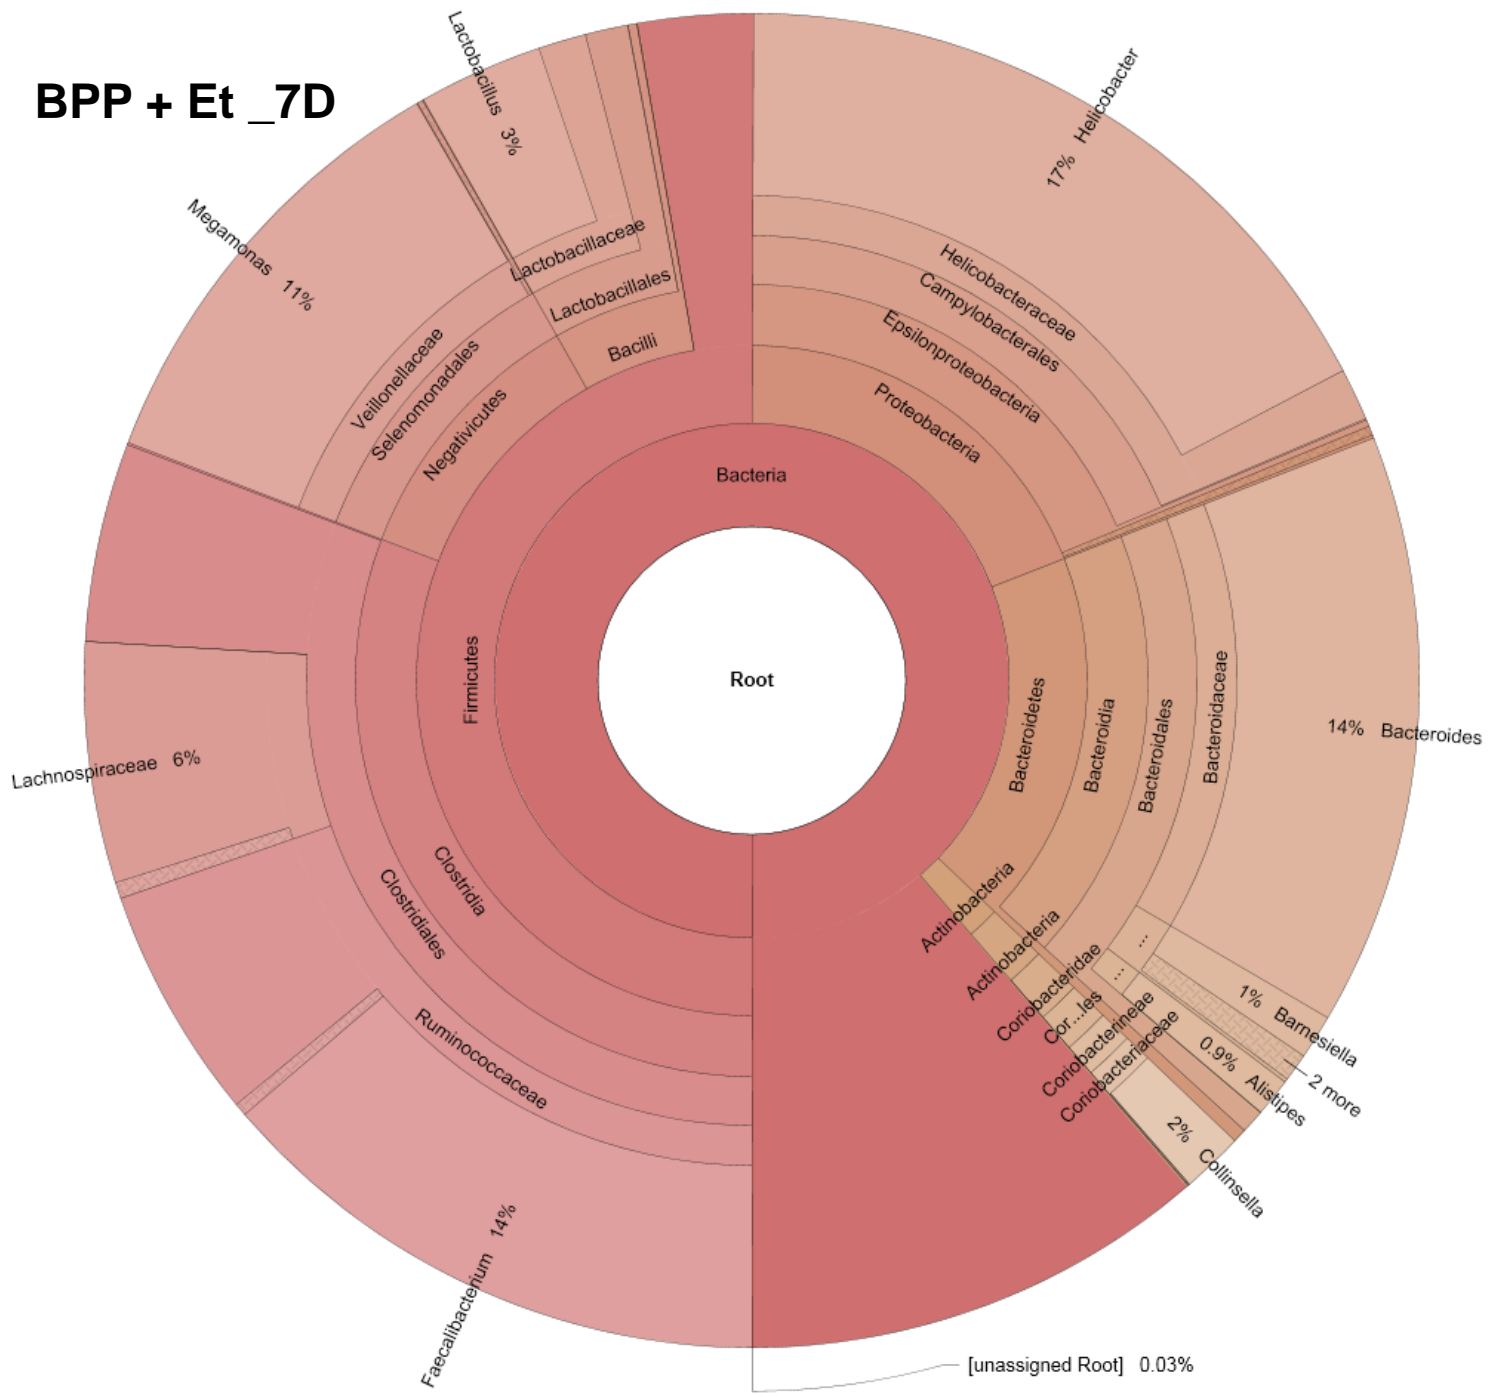



**S1 Fig. Compositions of gut bacteria present in the guts of 18- and 21-day-old chickens, fed with PBS and *Bidens pilosa*, infected with PBS and *E. tenella*.** The chickens from Groups 1 to 4 were sacrificed on days 4 (D4) and 7 (D7) and the bacterial DNA samples of their guts (ceca and intestines) were pooled into 8 samples. Individual bacterial community composition was analyzed and listed in S1A (CTR\_4D), S1B (BPP\_4D), S1C (Et\_4D), S1D (BPP + Et\_4D), S1E (CTR\_4D), S1F (BPP\_4D), S1G (Et\_4D) and S1H (BPP + Et\_4D) from the guts of samples. *B. pilosa* alleviates *E. tenella*-mediated gut pathology in chickens. (A) Summary of experimental protocol in this study. (B) Representative images of the guts of chickens in each group are shown. (C-D) H&E staining of the ceca (C) and jejunum (D) of the same chickens as (B).
